# Supplementary material
Source: publisher site journal article supplement (https://www.dovepress.com/article/361258)

## SUPPLEMENTAL MATERIAL

**Supplemental Figure 1.** Observed and model-predicted rates of LDL-C testing before and after MI hospitalization by sex (male, female), geographic region (Northeast, North Central, South, West), and calendar period (before or after PCSK9i approval on 24 July 2015). The pre-MI rate (in blue) was estimated in each subgroup by fitting a Poisson model to the pre-MI period, excluding the 12<sup>th</sup> interval in which observed rates (in black) began to diverge from pre-existing trends. We extrapolated the pre-MI model to the post-MI period to produce model predictions (in red).

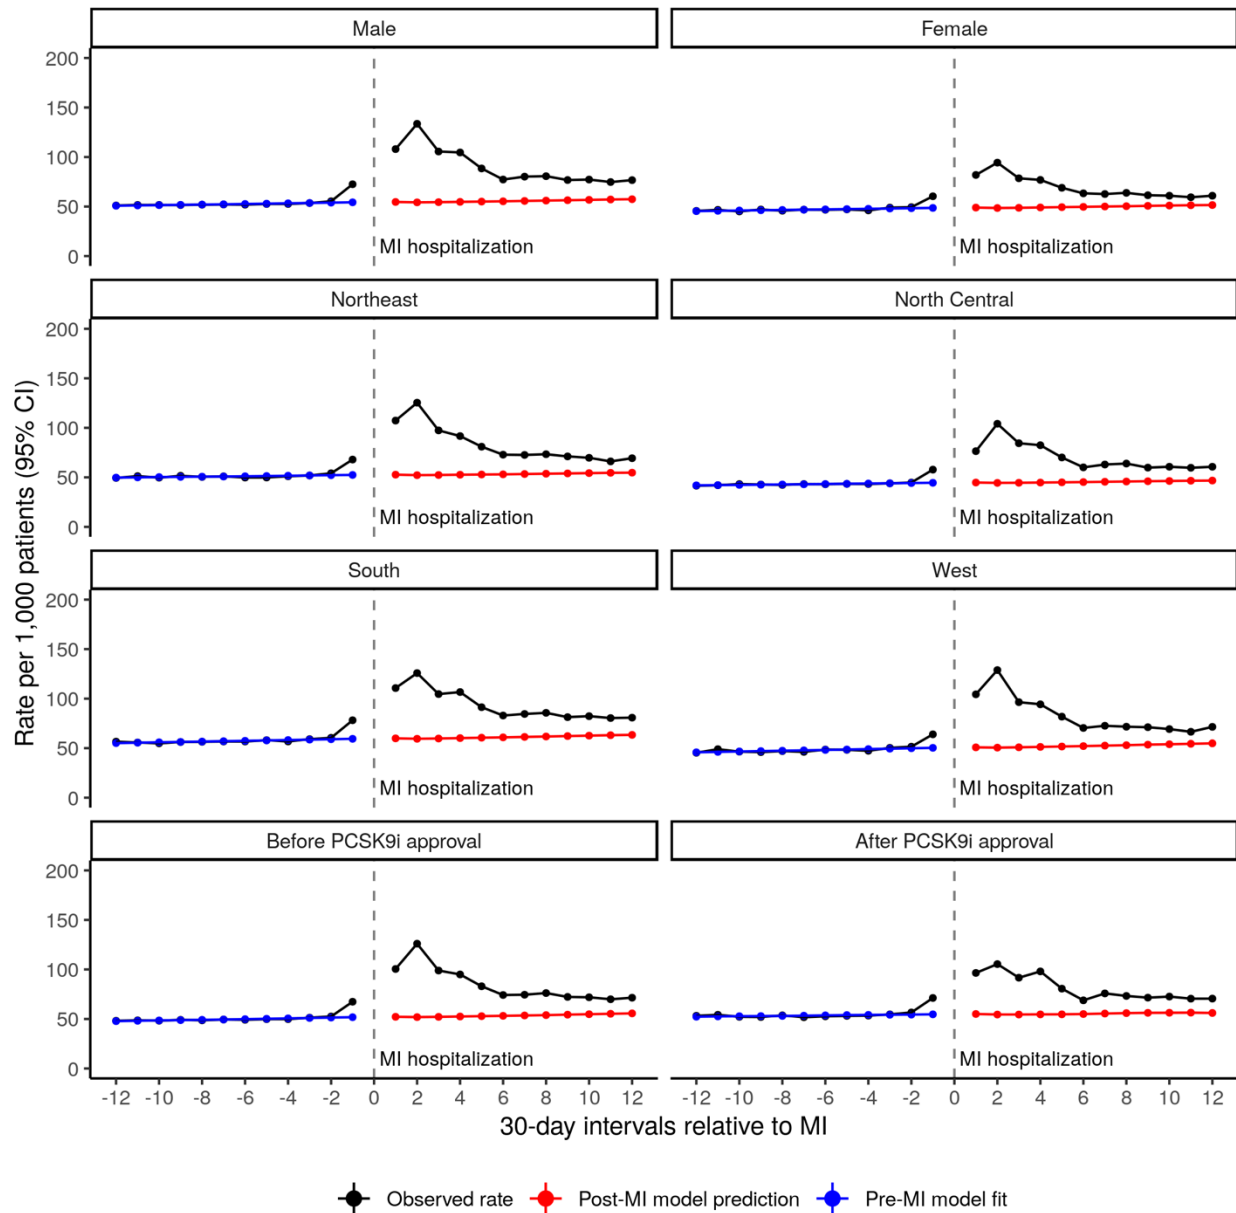

Supplement: Supplementary file 1 [file get_supplementary_file.php]
